# Supplementary material for: Synthesis of well-dispersive 2.0 nm Pd–Pt bimetallic nanoclusters supported on β-cyclodextrin functionalized graphene with excellent electrocatalytic activity
Source: Royal Society of Chemistry journal article supplement (doi:10.1039/c6ra24893d), 2017-01-01
Supplement: c6ra24893d1.pdf [file c6ra24893d1.pdf]

## Supporting Information

### Synthesis of well-dispersive 2.0 nm Pd-Pt bimetallic nanoclusters supported on $\beta$ -cyclodextrin functionalized graphene with excellent electrocatalytic activity

Xin Ran<sup>a,1</sup>, Long Yang<sup>a,1</sup>, Qing Qu<sup>a,\*</sup>, Shunling Li<sup>a</sup>, Ying Chen<sup>b</sup>, Limei Zuo<sup>a</sup>, Lei  
Li<sup>b,\*</sup>

<sup>a</sup> School of Chemical Science and Technology, Yunnan University, Kunming 650091,  
China.

<sup>b</sup> Laboratory for Conservation and Utilization of Bio-Resources, Yunnan University,  
Kunming, 650091, China.

<sup>1</sup>These authors contributed equally to this work.

\* Corresponding authors.

Tel.: +86 871 65035798; fax: +86 871 65036538.

E-mail: [quqing@ynu.edu.cn](mailto:quqing@ynu.edu.cn) (Q. Qu); [leelei@ynu.edu.cn](mailto:leelei@ynu.edu.cn) (L. Li)

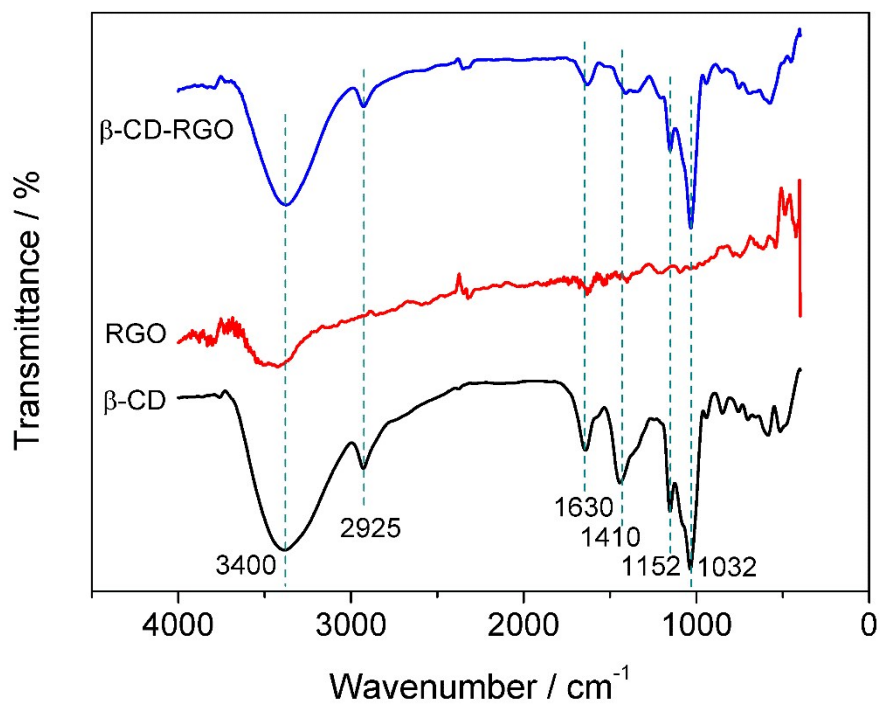

**Fig. S1** FTIR spectra of  $\beta$ -CD, RGO, and  $\beta$ -CD-RGO.

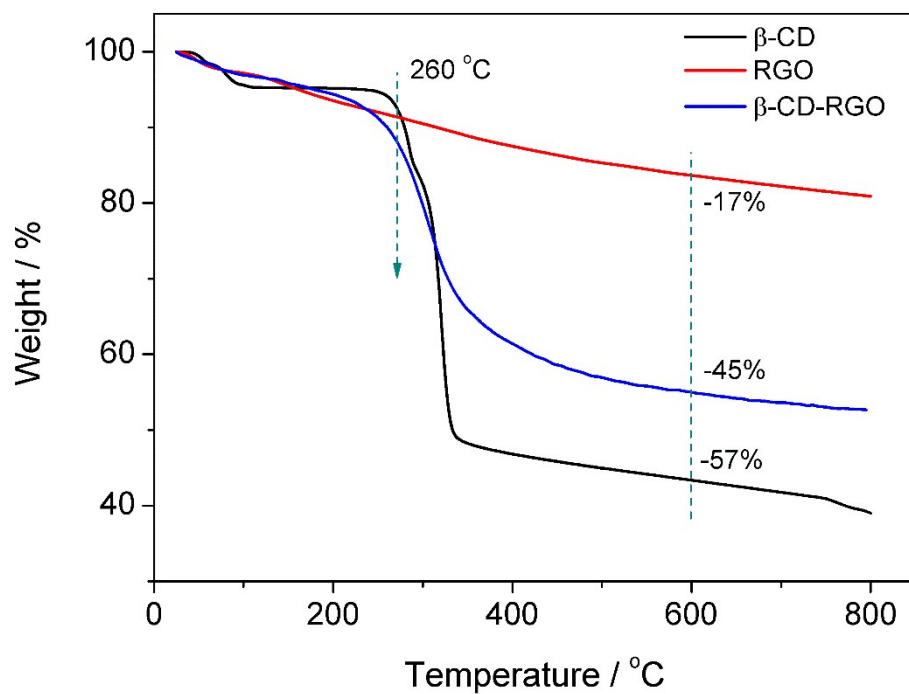

**Fig. S2** TGA curves of  $\beta$ -CD, RGO, and  $\beta$ -CD-RGO.

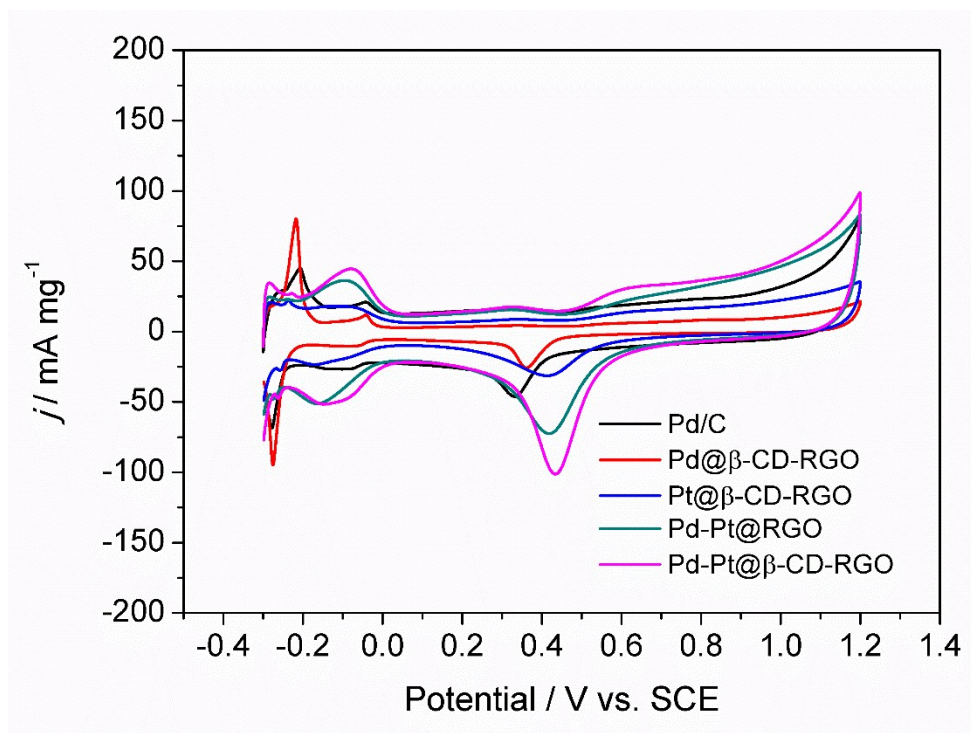

**Fig. S3** CV curves of Pd/C, Pd@ $\beta$ -CD-RGO, Pt@ $\beta$ -CD-RGO, Pd-Pt@RGO, and Pd-Pt@ $\beta$ -CD-RGO catalysts modified GCE in a  $N_2$  saturated 0.5 M  $H_2SO_4$  solution at the scan rate of  $50\text{ mV s}^{-1}$ .

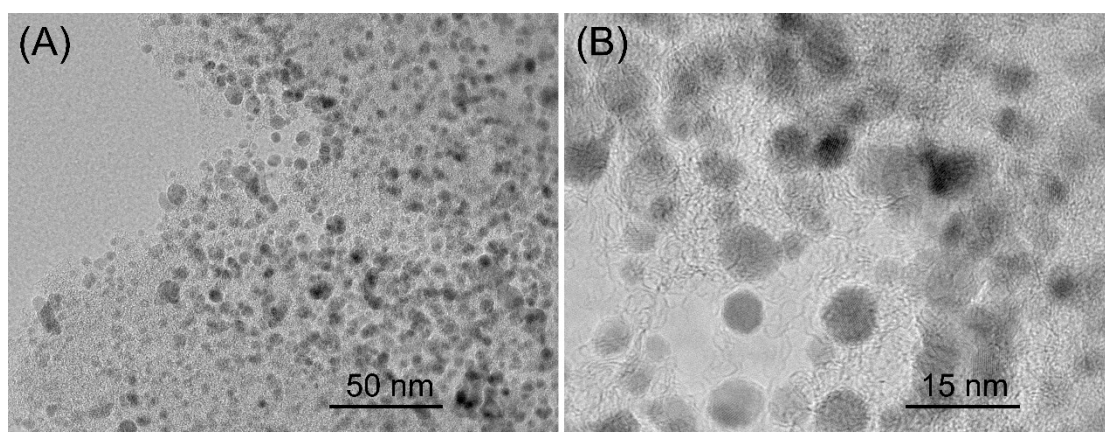

**Fig. S4** The TEM images of Pd/C at different magnification.

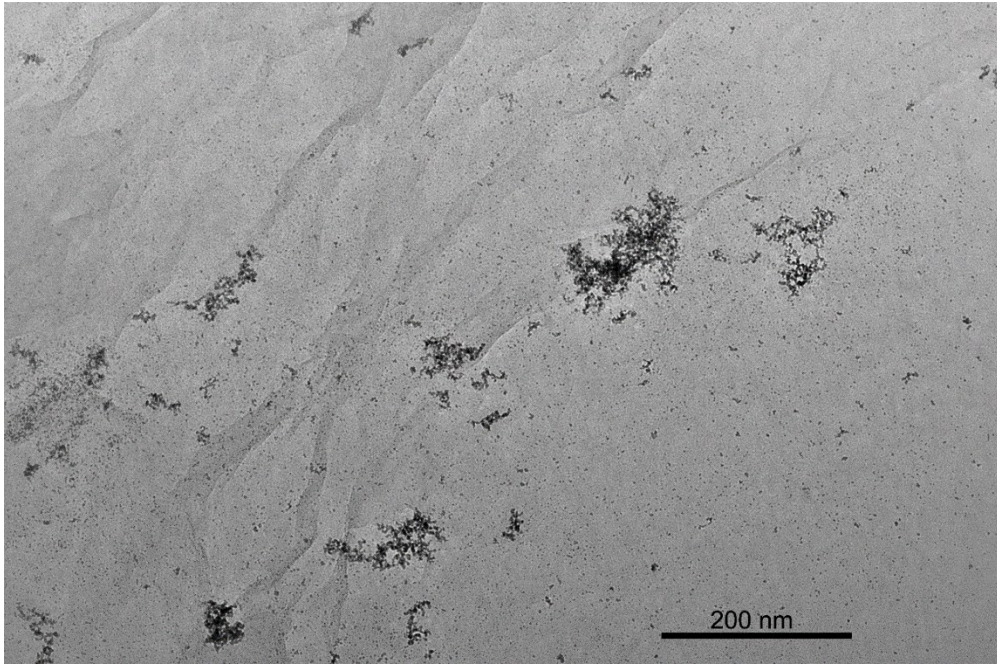

**Fig. S5** TEM image of Pd-Pt@ $\beta$ -CD-RGO after durability by current-time test recorded at  $-0.2$  V for 4000 s.
